# Supplementary material for: Identification of a gonadotropin-releasing hormone receptor orthologue in Caenorhabditis elegans
Source: PubMed Central journal article supplement (PMC1762030; doi:10.1186/1471-2148-6-103), 2006-11-29
Supplement: 1471-2148-6-103-S4.pdf [file 1471-2148-6-103-S4.pdf]

>sctr\_Oryctolagus\_cuniculus [EMBL: O46502]  
PDLACGVSMNDSSHERQHAYLLKLVKMYTVGYSSSLVMLLVALGILCAFRRLHCTRNYIHMHLFLSFILRALS NFIKDAVLF S  
SDDAIHCDAHR-----  
VGCKLVMVFFQY CIMANYAWLLVEGLYLHSLLVVSFFSERKC-----  
LQGFVVLGWGSPAMFVTSWAVTRHFLED-----  
SGCWDINANAAIWWVIRGPVILSILINIFILFINILRILTRKLRTOETRGQD-----  
-----MNHYKRLARSTLLLIPLFGVHYIVFVFSPE-GAMEIQL-----  
FFELALGSFQGLVVAVLYCFLNGEVQLEEVQKKW-----  
>ccapr\_Drosophila\_melanogaster [GenBank: JC7952]  
-----LNSFYFYETE QFAVLWILFTVIVLGN SAVL FVMFINK-----  
NRKSRMNYFIKQLALADLCVGLLNVLTDI IWRIT---ISWRAGN-----  
LACKAIRFSQVCVTSSTYVLVAMSIDRYDAITHPMNFSKSWK--  
RARHLVAGAWLISALFSLPILVLYEEKLIQGH-----PQCWIEL-----GSPIAWQVYM--  
SLVSATLFAIPALII SACYAIVKTIWAKGSIFVPTER--AGFGAAPARRASS-----  
RGIIPRAKVKTVMKMTLTIVFVFIICWSPYIIFDLLQVFGQIP-H-  
SQTNIAIATFIQSLAPLNSAANPLIYCLFSSQVFR T LSRFPFPKWF T-  
>caccr\_Drosophila\_melanogaster [GenBank: Q868T3]  
-----LNSFYFYETE QFAVLWILFTVIVLGN SAVL FVMFINK-----  
NRKSRMNYFIKQLALADLCVGLLNVLTDI IWRIT---ISWRAGN-----  
LACKAIRFSQVCVTSSTYVLVAMSIDRYDAITHPMNFSKSWK--  
RARHLVAGAWLISALFSLPILVLYEEKLIQGH-----PQCWIEL-----GSPIAWQVYM--  
SLVSATLFAIPALII SACYAIVKTIWAKGSIFVPTER--AGFGAAPARRASS-----  
RGIIPRAKVKTVMKMTLTIVFVFIICWSPYIIFDLLQVFGQIP-H-  
SQTNIAIATFIQSLAPLNSAANPLIYCLFSSQVFR T LSRFPFPKWF T-  
>ccapr\_receptor\_Anopheles\_gambiae [GenBank: NP\_996297]  
-TRGEEIN SFYFYETE QFAVLWILFTVIVLGN SAVL VTLMLNR-----  
TRKSRMNFYFIKQLAIADLCVGLLNVLTDI IWRIT---VWRAGN-----  
AACKAIRFVQVCVTSSTYVLVALSIDRYDAITHPMNFSGCWS--  
RARKLVA AAW SFSILFSLPITYFYEERLIQ GK-----MQCWIDL-----VEAWRWQLYM--  
CWVSGSLFVVPALII SACYAVIVRTIWAKGTILGPIDRTHNGMADLATRRASS-----  
RGIIPRAKVKTVMKMTIVIVIVFVLCWSPYIIFDLLQVFGQIP-A-  
TQTNVAIATFIQSLAPLNSAANPLIYCLFSTQVCRM IKRLPPFRWLWS  
>oxyr\_Homo\_sapiens [GenBank: NP\_000907]  
-----LARVEVAVLCLILLLLALSGNACVLLALRTR-----  
QKHSRLFFFMKHLSIADLVVAVFQVLPQLLWDIT---FRFYGPD-----  
LLCRLVKYLQVVG MFASTY LLLLMSLDRCLAICQPLRSLR---  
RTDRLAVLATWLGCLIVASAPQVHIFSLREVADG-----VFDCWAVE-----IQPWGPKAYI--  
TWITLAVYIVPVIVLAACYGLISFKIWQNRLRKTAAAAAAEAP--EGAAAAG--DGGRVA-----  
LARVSSVKLISKAKIRTVKMTFIVLAFIVCWTPFFFVQMWSVWDAN-----  
APKEASAFIIVMLLASLNSCCNPWIYMLFTGHLFH ELVQRF-----  
>oxyr\_Bos\_taurus [GenBank: NP\_776559]  
-----LARVEVAVLCLILFLALSGNACVLLALRTR-----  
HKHSRLFFFMKHLSIADLVVAVFQVLPQLLWDIT---FRFYGPD-----  
LLCRLVKYLQVVG MFASTY LLLLMSLDRCLAICQPLRSLR---  
RTDRLAVLVTLWLGCLIVASAPQVHIFSLREVADG-----VFDCWAVE-----IQPWGPKAYI--  
TWITLAVYIVPVIVLATCYGLISFKIWQNRLRKTAAAAAAEAAAGAEGEAAD--WAGRAI-----  
LARVSNVKLISKAKIRTVKMTFIVVLA FIVCWTPFFFVQMWSVWDAD-----  
APKEASPFIIAMLLASLNSCCNPWIYMLFTGHLFQELVQRF-----  
>oxyr\_Gallus\_gallus [GenBank: NP\_001026740]  
-----MAKVEVTVLCILFLALSGNLCVLLAIHTTR-----  
QKHSRMYFFMKHLSIADLVVAVFQVLPQLIWDIT---FRFYGPD-----  
FLCRLIKYLQVVG MFASTYMLLLLMSLDRCLAICQPLRSLHR---  
RADRVSVLLTWLCLLVSIPQIHIFSLRDVGN G-----VYDCWADF-----IQPWGPKAYV--  
TWITLMVYIIPVLMLSVCYGLISFKIWQNVKLT AHGPP-----GGQSST--ARGGAA-----  
FARVSSTR LISKAKIRTVKMTFIVLAFIVCWTPFFFVQMWSVWDTN-----  
APQEASPFIIAMLLASLNSCCNPWIYMLYTGHLFHDL MRRF-----  
>vasr1a\_Homo\_sapiens [GenBank: NP\_000697]  
-----LAKLEIAVLAVTF AVAVLGNSSVLLALHRTP-----  
RKTSRMHLFIRHLSLADLAVAFFQVLPQMCWDIT---YRFRGPD-----

WLCRVVKHLQVFGMFASAYMLVVMVTADRYIAVCHPLKTLQQPA-  
RRSRLMIAAAWVLSFVLSTPQYFVFSMIEVNNVT-----KARDCWATF-----IQPWGSRAYV--  
TWMTGGIFVAPVVILGTCYGFICYNIWCNVRGKTAS-RQSKGAE--QAGVA-FQKGFL--  
APCVSSVKSISRKIRTVKMTFVIVTAYIVCWAPFFIIQMWSVWDPMSVW-  
TESENPTITITALLGSLNSCCNPWIYMFSSGHLQDCVQSF-----  
>vasr1a\_Tribolium\_castaneum [GenBank: XP\_967376]  
-----LARVEVATLAIIFLVTVIGNSTVLLALWTRRRYAG--  
RKKLSRMYFFILHLSIADLITAFLSVLPQLAWDIT---YRFYGGF-----  
LLCKVVKYGQTLGPLYLSSYVLMATAIDRHQAICYPLTYCSWTS-  
RRSKVMVYLAWVASLAFQPLTIFTYTSVGED-----EYDCWATF-----QEPWKGKRAYV--  
TWYSISVFMVPLVVLIFTYTSICIEIWQSSSESLRPRSS-----QKSAP---GKR-----  
TPLISRAKINTVKQTIIVIVMYIACSTPFILAQWLWATWDPQ-----  
SPFIDVEFKKVAQEDYIP-----  
>vasr2\_Homo\_sapiens [GenBank: NP\_000045]  
-----LARAELALLSIVFVAVALSNGLVLAALARRGR-----  
RGHWAPIHVFIGHLCLADLAVALFQVLPQLAWKAT---DRFRGPD-----  
ALCRAVKYLQVMGYASSYMLAMTLDRHRAICRPLAYRHGSGAHWNRPVLVAVAFSLLLSLPQLFIFAQRNVEGGS-----  
-----GVTDCWACF-----AEPWGRRTYV--  
TWIALMVVAPTGLGIAACQVLIFREIHASLVPGPSPSERPGRRR---GRRTGSPGEG-----  
AHVSAAVAKTVRMTLVIVVVYVLCWAPFFLVQLWAAWDPE----  
APLEGAPFVLLMLLASLNSCTNPWIYASFSSSVSSELRSLL-----  
>gnrhr2\_Homo\_sapiens [GenBank: Q96P88]  
-VEGSELPTFSAAAKVRVGVTVLTVFVSSAGGNLAVLWSVTRREPSQ----  
LRPSPVRRFLIHLAAADLLVTFVVMPLDATWNIT---VQWLAVD-----  
IACRTLMFLKLMATYSAAFLPVVIIGLDRQAAVLNPLGSRSGV--RK---  
LLGAAWGLSFLLAFFPQLFHTVHXAGPV-----PFTQCCTTKG---SFKAQWQETTYN--  
LFTFCCLFLLPLTAMAIKYSRIVLSVSRPQTRKG---SHAPAGEFALPRSFDN-----  
CPRVRLRALRLALLILLTFILCWTPYLLGMWYWFSPTMLT--  
EVPPSLSHILFLLGLLNAPLDPLLYGAFTLGCR-----  
>gnrhr2\_Sus\_scrofa [GenBank: AAS68622]  
-VESSELPTFSVAAKVRVGVTVVLFVSSAGGNLAVLWSVTRPQPSQ----  
LRPSPVRRFLFAHLAAADLLVTFVVMPLDASWNIT---VQWLAGD-----  
IACRTLMFLKLMAMYAAAFLPVVIIGLDRQAAVLHPLGPRSGG--RK---  
LLGAAWLLSFLALPQLFHTVRRAGPV-----PFTQCCTTKG---SFKAQWQETTYN--  
LFTFCCLFLLPLTVMTCYSRIVLSVSSPRTRKG---NDAPAGEFTLRRSLDN-----  
RPRVRLRALRLALLVLLTFVLCWTPYLLGLWYWFSPTMLS--  
EVPPSLSHILFLLGLLNAPLDPLLYGAFTLGCR-----  
>gnrhr1\_Rana [GenBank: AA050198]  
-HTHFQLPTFSAAKARVIITFVIFTLSATCNLAALWSAARTS--R----  
KKRSHVRILILNLTADLLVTFIVMPLDAIWNIT---VQWHAGD-----  
IACRILMFLKLLSMYSAFVTVVISVDRQSAIILNPLAINDAK--  
KKNKIMLSVAWLMSAVLSLPQLFHTVTITTEPH-----NFTQCTTRG---SFQQHWQETVYN--  
MVSFVCLFLLPLLIMICCYSRILLEISKRMK-----GTLSSKEVYLRCSKNN-----  
IPKARMRTLKMSVVIVSSFIICWTPYFLLGLWYWFYPEIME-  
EKVSQSTHILFIFGLVNACLDPIYGLFTIHFRRKSLQRYC-----  
>gnrhr\_Typhlonectes\_natans [GenBank: AAD49750]  
-----PTFSTAACKVRVTITFVLFISSACFNIIALWTITQK---Y----  
KKRSHVRILISNLAVADLLVTFIVMPLDAIWNIT---VQWYAGD-----  
LVCRVLMFLKLVAMYASAFVTVVISLDRQSAIILNPLGIGDAK--  
KKNKIMLCVAVVLSVLLAVPQLFVHAVSPSQSE-----YFIQCATVG---SFQGHWQETLYN--  
MFTFSCFLFLLPLLIMVLCYSRILIEISRKMKK-----ACVSSKEVHLRRSSNN-----  
IPKARLRTLKMSIVIVLTFIVCWTPYLLGIWYWFSPPEMLTRERVPPLSHILFLLGFLNACLDPLIYGLFTI-----  
-----  
>gnrhr3\_Oryzias\_latipes [GenBank: BAC97833]  
--DALQLPTFSTAACKVRVIITFTLCAVSAVCNLLVLAAGKG---G----  
KKRSHVRILIMNLTVADLLVTFIVMPVDAAWNIT---VQWQAGD-----  
LACRLLMFMKLVAMYSAFVTVVISLDRQSAIILNPLGISEAK--  
RKSIMLTVAWTTSVILSLPQMFIFHNVTISVPE-----NFTQCTTHG---SFVQRWQETLYN--  
MFTFVCLFLLPLVIMIFCYTRILVEISSRIAR-----TNMVSARDIHLRRSHNN-----

IPKARMRTLKMSIVIVTSFIIICWTPYYLLGLWYWLFPKME-  
ETVSHSLTHMLFIFGLFNACLDPIITYGLFTIHLRQGAKR-----  
>gnrhr\_Ciona\_intestinalis [GenBank: NP\_001027765]  
-VLIQTWFQFDTLHLVRLVLTWLLFCLSMAGNMFVLSLRGS-----  
KSRHFIMFHLALSNLVYTFVMPSPDAVWNTT---MEWLAGD-----  
VMCRLCQMMKQFGMYASSFMVVVIGADRVTGILSPLPCHSQR--  
KRGYYMVATAWISSLICCLPAGFIFSVASIPTCEG-----IPIYQCIDFN---VLQDVSLLRPYY--  
FFTMCMSFLLPLICTLVSYSLIVCEISNMKER-----DRVLMGRRHSVNTAS-----  
IQRAKNRTILMRTLITLTLFLVCWGPYYGKGIYDWFIRYEDH--  
TPPDAWDTVMYVVMYLNPNVLPVLPVIVFVGLKEIRGKFKQRLN-----  
>akhr\_Tribolium\_castaneum [GenBank: ABE0225]  
--KLPISMRFNEGHQLSIIIVYSILMVFSIAIANTTVLVLIVKRRR-----  
KTPSRINTMLMHLAIADLLVTFMMPLEIGWAST---VSWYAGD-----  
AMCRIMMFFRMFGLYLSSFILVCISVDRFYAVLKLPLYLRALD--  
RRDKFMLLGAWLGATLCSIPQMVVFHVESHVFNIT-----WYQQCVTYN---VFPTYAHELTLYL--  
LFGMVMYALPLAVIIFSASILLEIRRRTR-----NPYGDSVTRSSLAF-----  
LGKAKVRTLKMTIIIVLVFFVCWTPYYVMCIWYWLDR--  
ESAKNVQRIQKALFLFACTNSCMNPVYGVFNIRA-----  
>akhr\_Anopheles\_gambiae [GenBank: ABD60146]  
-YEMPIDMRFNSGHILSIMVYTTLMVFSATGNLTVLSILAQRKV-----  
RASSRINIMLAHLAIADLLVTFMMPLEIGWAYT---VRWTAGD-----  
LMCRVMAFFRTFGLYLSSFILICISVDRYFAVLKP--LKVHE--  
HRAVLMIAAAWIMSGLCSLPQAFIFHLEGHVFNIT-----GYQQCVTYH---YFEEIYQIIYN--  
VLVMCLMYTFPLIVILYCYGSIYYEIFSRTN-----PRNLESFRRSSIDV-----  
LGRAKRKTLRMTIMIVIVFVVCWTPYYVMSLWYWLDR--  
ESTKNVDQRIQKGLFLFASTNSCMNPVYGVFNVRK-----  
>akhr\_Periplaneta\_americana [GenBank: ABB20590]  
---MTDDMKFNDGHRMSIITYSILMVSVAGNSTVLITILKRGR-----  
TLRYGNNYMFHMLAIADLLVTFMMPLEIAWNIT---VSWKGGD-----  
LMCRIMLFFRTFGLFLSSFVIVCISLDRCAVAILRPMKSKLLNVARRGKMLMTVAWILATLCSLPQAVIFHVEPHVFNVT-----  
-----WYEQCVSN---FFSTKMHEFTYR--VLGMVMYGLPLIVIVISYACILGEIIRRYQ-----  
LSPDDSFRRSSLVF-----LNRARNRTLKMAIIFVVFVICWTPYYVMCLWYWIDE--  
RSAETVDHRVQKALFLFASTNSCMNPVYGVFNRLGRGSGYGATGGRVQG  
>akhr\_Bombyx\_mori [GenBank: NP\_001037049]  
--ELPLEMRFNYSHMVSMTVYVSLMVISATGNLTVLYQLVRRRR--A---  
KRASRLDILLMHLAVADLMVTFMMPLEIAWAGT---VQWFAGD-----  
LMCRVMMFTRTFGLYLSSFVLICIAVDRYAAILKPLNVTWIATVRRR--  
IIVAWVCAGLASLPQSFIFHVEEHPEVK-----GYNQCVSYG---SLPTEKHEFAYF--  
LVNMILMYVIPLVSTLYCSCAALFEIIRAN-----TAN-DKMRRSIGL-----  
LGRARARTLKMTVTIVLVFFTCWSPYCYCLWYWIDK--  
ESIKNLDPALQKAMWLFSCNTSCANPIVYGVFNRRNRWNWRAGKFNQGRCRS  
>gnrhr\_Crassostrea\_gigas [GenBank: CAI64587]  
-----LKFSNDYAHSIISLGVVFLIGALGNIASFVTLCSKN-----  
RKSPTNFLLHLSSADLLVMFVIVPVGEMIHVFNAT---IAWLGN-----  
FLCKLYHFLWNFGQYVATFLLCCISIDRYLAFVFLRSLTQS-  
PRTRSFMAATAWVLSAILSAPESVIFHVETHPKYR-----TFRQCVTFN---FFPSHNHELAYN--  
LFNLTLYALPLLIITTSYSLILWEISKTKQCKEETKCLSTRSRLRRSSVGN-----  
MERARIRTLKMTLVIVSVFVICWTPYFVLSAWWWVFD--  
DSASQLDPKVQRGLFLFAVNSCMDPIVYGMFTT-----  
>gnrhr1\_Caenorhabditis\_briggsae [GenBank: CAE60355]  
-----IAIKSSVISIVLTYLALFILAFIGNVTMFMILCRNQL-----  
VKVRRVHSLLLHMNIAHLLVTLVVMPEILHNYM---VAWFAGD-----  
IMCRVCKFFDVFGLSLSMNVLICITLDRFYSIFFPLYAMRAR--  
KSVQRMVSIWIVSLITSAPQLYLFKTAEHPCFA-----WYTQCVSLN---  
FIGELSNVVFYFSIINI IQVYIAPLIVTVICYSLILWKISRKTKLVGEKESEKSSELLLRNGQNN-----  
-----LEKARSRTLKMTFVIVLAFVISCWTPYVILMFLHFLR-----  
RTDWIPKDIRKFIYAFVLSAISPYLYGYFSF-----  
>gnrhr1\_Caenorhabditis\_elegans [GenBank: NP\_491453]  
-----VTVNDSVLSIVFTYLAFLAFVGNVTMFLILCRNQL-----

VKVRVHSLLLHMNIAHLLVTLVMPKEILHNYM---VAWFAGD-----  
VMCRICKFFDVFAISLSMNLICITLDRFYISIFFPLYAMRAR--  
KSVQRMVSAFWTISFVTSAPQLYLKFTATHPCFD-----WYTQCVSKN---  
FIGELSNADVFFFISVNI IQVYIAPL FVTVCYSLILWRISRKSKLVGEKESEKSSSELLLRNGQNN-----  
-----LEKAKSRTLKMTFVIVLAFIFCWPYPYSILMFLHFLR-----  
HTDWIPKDIRKFIYAFVLSAISPYLYGYFSF-----  
>corr\_Anopheles [GenBank: AAQ67361]  
LSCYEHAPTLKSGVIRVIVLSAMAIVSLLGNVATMWNIQNRKSRRVTRHNWSAIYSLIFHLSIADVLVTGFCLIGEAAWY  
T---VDWVAGN-----  
LFCKLFKLCQMFSLYLSTYVVLVGVDRWVAVKYPKMSLNTA--  
RRCHRFLFVAYLLSFLSTPQWMI FRVAKGPFVE-----DFYQCVTHG---FYTDRWQEQLYT--  
TFTLVFMFI IPLLILIGTYLSTFMTISSSEKIFRIDTSAVDRTTYRRSDTNRQ-----  
RLIHKAKMKSRLRISVVIVVAFVVCWTPYYIMMLIFMFLN---  
PTERFGE DLQSGIFFFGMSNSLINPLIYGAFHLVPIRQRNQNQHVRG  
>corr\_Manduca sexta [GenBank: AAR14318]  
-SCLEHAPILTKSTVIRASVLSAMA ILSFFGNLATIISIQRGKRGRGRARPSWTAIYSLIFQLSIADLLVTIFCIAGEAAWSF  
T---VQWYAGN-----  
IACKIFKFLQMFALYQSTFIIVLVIGVDRWLAVKYPKMSMATA--  
TRSGRLVVI AWVLSVLSIPQTVVFRVAKGPFVE-----EFYQCVTHG---FYTERWQEQAYT--  
TLSLVFMFVLPVLVILISTYVSTVRTIARSEKVFKP---EVRREQEYFTPDMMNR-----  
RLIDRAKMKSLRMSVVIVAAFLVWVAPYYMMI IFTFLN---  
PDKDQSEELLSGIFFFGMSNSLVNPIYIYAFHLWPKKRSRHSRHS DRESGG  
>corr\_Drosophila melanogaster [GenBank: JC7896]  
EHVMDHAPQLSRSGLLKVYVLA VMALFSLGNNLLTIWNIYKTRISRNSRHTWSAIYSLMFHLSIADVLVTWFCIIGEAAWCY  
T---VQWLANE-----  
LTCKLVKLFQMFSLY LSTYVVLVIGVDRWIAVKYPKMSLNMA--  
KRCHRLGGTYILSLVLSLPQFFIFHVARGPFVE-----EFYQCVTHG---FYTADWQEQMYA--  
TFTLVFTFLLPLCILFGTYMSTFRTISSSEKMFQG-SKLANYSTAKLPTQTNRQ-----  
RLIHKAKMKSRLRISVVI IIAFLICWTPYYMMIMFMFLN---  
PDKRIGDDLQDAIFFFGMSNSLVNPLIYGAFHLCPGKGGKSSGGGNNNA  
>gnrhr2\_Caenorhabditis briggsae [GenBank: CAE60908]  
-----LGYITSDYAQMLIYGIFVLIGLPVNISTLIYMLKRYR-----  
HAKSFLLLLHINLNISDILVGLYVPLIGLWLVLT---LEWRGGE-----  
YLCKFMRFVDAFVFAISSNIMVCI ALYRLSALRYPLWVNAVG-  
HSRVPRMLVLAWSLAVVTMLPQMFVWNEVQFNHITQCVT-----VWTEI INKEHALSESELRNMKLYS--  
IQNAII IFYVPLMILVACYVLILKDIYKTLNTDTECSSAAYLSEMSSSKTGKATAHKKEQESFVTLTTRTV---RG--  
QEKFRRAKVRSLRITLLLLILTYAVTWL PYNLLS WWMVLHFD S---  
YKENLDSNYILNSLVVLSVINPFIYGRGCG-----  
>gnrhr2\_Caenorhabditis elegans [GenBank: CAB02736]  
-----LGHVPSDYAQM LLYGIFALIGLPVNISTLIYMLKRYR-----  
HAKSFLLLLHINLNISDILVGLYVPLIGLWLVLT---LEWRGGA-----  
YLCKFMRFVDAFVFAISSNIMVCI ALYRLSALRYPLWVNAVG-  
HSRVPRMLILAWALAVVTMLPQMLVWNEVQFSNITQCVT-----VWTEI INKREKLSESELRNMKLYS--  
IQNATI IFYIPLMILVACYVLILKDIYKTLNTDTECSSAAYLSEMSSSKTGKKAALHKKDQESFVTLTTRTV---RG--  
QEKFRRAKVRSLRITLLLLILTYAVTWL PYNLLS WWMVLHWDS---  
YRENLDSNYILNSLVVLSVINPFIYGRGCG-----  
>rhodlk\_Anopheles gambiae [GenBank: EAA01405]  
----QFPPMNPLWHSILGFAIFMLGMISMTGNGCVMI FTNTKS-----  
LRTPSNLLVVNLA FSDFFMMFTMGPPMVINCWH---ETWTFGP-----  
FACELYAMLGSLFGCASIWMTMIAFD RYNVIVKGLAGKPMTN-  
NGALLRILGVVWFALFWTLAPLFGWNRYP EGNMT-----ACGTDY--LTQT--WLSRSYI--  
I IYAI FVYWLPLLTIIYSYTFILKAVSAHEKNMREQAKKMNVASLRTQEAQNT-----  
-  
STEMKLAKVALVTISLWF-----  
-----  
>rhodlk\_Culex pipens [GenBank: AAP56248]  
----QFPPMNPLWHSILGFAIFCLGMVSMIGNGCVISIFTSTPS-----  
LKAPS NLLVVNLA FSDFLMMFTMGPPMVINCWH---QTWVFGP-----  
FACELYACLGSLFGCTS IWMTMLIAFD RYNVIMKGLAAKPMTN-

SGAKIKILGVWAFSLFWTLAPFFGWNRYVPEGNMT-----ACGTDY--LTQT--WLSRSYI--  
LIYAI FVYWLPLLLTI IYSYTFILKAVSAHEEQMREQAQKKNVASLRSSSEAQQT-----  
-SAEIKLAKVALVTISLWFMARTPYLVINFTGIFKAAP-----  
ISPLATIWGS LFAKANAVYNP IYVYGIGHPKYRA-----  
>rhodlk\_Rana\_castesbeiana [GenBank: BAA76864]  
----QSHLGT PGMFMSAFMLFTIIFGFPLNVLTVICTIKY-----KKLRSHLNYILVNLAVANLIVICFGS-  
TTAFYSFSQ--MYFALGT-----  
LACKIEGFTATLGGMVS LWSLAVVAFERFLVICKPMGSFTFR-  
ENHAILGCI FTWVIGLVAAS PPLLGWSRYIPEGLQCS-----CGPDW--YTVNNKWNNESYV--  
IFIFCFCFGFPLAVIVFSYGRLLLT LHAVAKQ-----QEQSAST-----  
QKAEREVTRMVIMMIAGFLVCWLPYASFALWAVTHRG----  
ETFDLRMASIPSVFSKASTVYNPFIYIFMNRQFRS-----  
>rhodlk\_Homo\_sapiens [GenBank: AAX37093]  
-----AFLPLGLKVTIVGLYLAVCVGGLLGNCLVMYVILRHTK-----  
MKTATNIYIFNLALADTLVLLTLPFQGTDILLG----FWPFGN-----  
ALCKTVIAIDYNNMFTSTFTLTAMSVDRYVAICHPIRALDVRTSSKAQAVNVAIWALASVVGVPVAIMGSAQVEDEEI-----  
-----ECLVEIP---TPQDYWGPVFA--ICIFLFSFIVPVLVIVSVCYSLMIRRLR-----  
GVRLLSGSREK-----DRNLRRI TRLVLVVAVFVGCWTFVQVFLAQGLGVQ--  
PSSETAVAILR FCTALGYVNSCLNP ILYAFLDENFKACFR-----  
>vasr1a\_Rattus\_norvegicus [EMBL: Q5M8D1]  
-----LAKLEIAVLAVIFVAVLGNSSVLLALHRTP-----  
RKT SRMHLFIRHLSLADLAVAFFQVLPQLCWDIT---YRFRGPD-----  
WLCRVVKHLQVFAMFASAYMLVVM TADRYIAVCHPLKTLQQPA-  
RRSRLMIATSWVLSFILSTPQYFIFSVIEIEVNNG-----TKTQDCWATF-----IQPWGTRAYV--  
TWMTSGVFVAPVVVLGTCYGFICYHIWRNIRGKTASSRHSKDGKSGEAVGPFHKGLLV-----  
TPCVSSVKISIRAKIRTVKMTFVIVSAYILCWAPFFIVQMWSVWDDNFIV-  
T DSENPSITITALLASLNSCCNPWIYMFSGHLLQDCVQSF-----  
>akhr\_Apis\_mellifera [GenBank: NP\_001035354]  
---LPIDMRFNEGHI VSI VFSVLMII SAIGNTTVLILITCRKR-----  
VSKSRIHIMLMLAIADLLVTF LMMPLEIGWAIT--VSWKAGD-----  
VMCRIMAFFRMFGLYLSSFVLCISMDRYYAVIKPLQLWDVD--  
KRGKIMLSFAWIGSVVCSLPQTI VFHLETHPNVT-----WYSQCVTFN---AFPTYTHEITYS--  
LFGMIMMYWFLPVVII YTYT SILL EIRRRSK-----KSEDDKIRRSSIGF-----  
LTRAKIRTLKMTVII IAVFFICWTPYVMSLWYWIDR--  
NSAYKIDQRIQKGLFLFACTNSCMNP IYVYGA FNIRD-----  
>vasr1a\_Microtus\_ochrogaster [GenBank: AAD02821]  
-----LAKLEIAVLAVIFVAVLGNSSVLLALHRTP-----  
RKT SRMHLFIRHLSLADLAVAFFQVLPQLCWDIT---YRFRGPD-----  
WLCRVVKHLQVFAMFASAYMLVVM TADRYIAVCHPLKTLQQPT-  
RRSRLMIAASWVLSFLLSTPQYFIFSMIEIEVNNG-----TKTQDCWATF-----IQPWGTRAYV--  
TWMTSGVFVVPVILGTCYGFICYHIWRNVRGKTAS-RQSKG---SGEDVAPFHKGLLV-----  
TPCVSSVKTISR AKIRTVKMTFVIVTAYILCWAPFFIVQMWSVWDDNFIV-  
T DSENPSITITALLASLNSCCNPWIYMFSGHLLQDCVQSF-----  
>ghrhr\_homosapiens [EMBL: Q02643]  
YPVACPVPLELLAEE--  
ESYFSTVKI IYTVGHSISIVALFVAITILVALRRLHCP RNYVHTQLFTTFILKAGAVFLKDAALFHSDDDTDHCSFST-----  
-----VLCKVSVAAASHFATMTNF SWLLAEAVYLNCLLASTSPSSRRA----  
FWWLVLGAWGLPVLF TGTWV SCKLAFED-----  
IACWDLDDTSPYWWII KGP I VLSVGVNFGFLNI IRI LRKLEPAQGS LHT-----  
-----QSQYWRLSKSTLFLIPLFGIHYIIFNFLPDNAGLGIRL-----  
PLELGLGSFQGFIVAILYCFLNQEV RTEISR-----  
>ghrhr\_Gallus\_gallus [EMBL: Q309X7]  
YHIACPVEDEI PLEE--  
QSYFSTIKI IYTVGYSLSITS LIIAVTVLMAFRRLRCPRNYIHIQLFFTFILKAI AIFIKDSVLFQEEDIDHCSFST-----  
-----TECKISVVFCHYFMMTNFIWLLVEALYLNCLLLSSLSHGRRY----  
FWWLVLFGWGFPTLFTFIWILAKFYFED-----  
TACWDINQDSPYWWII KGP I IISVGVNFVLFINI IRI LKLDPRQINFNN-----  
-----SSQYRRLSRSTLLLIPLFGTHYIVFNFLPEYTS LGIRL-----  
YLELCIGSFQGFIVAILYCFLNQEVQTEIGR-----

>sctr\_Homo\_sapiens [EMBL: Q53T00]  
PNLACGVNVNDSSNEKRHSYLLKLVKMYTVGYSSSLVMLLVALGILCAFRRLHCTRNYIHMHLFVVSFILRALS NFIKDAVLF S  
SDDVTYCDAHR-----  
AGCKLVMVLFQYICIMANYSWLLVEGLYLHTLLAISFFSERKY----  
LQGFVAFGWGSPAIFVALWAIARHFLED-----  
VGCWDINANASIIWIRGPVILSILINFIILFINILRILMRKLRTQETRGNE-----  
-----VSHYKRLARSTLLLIPLFGIHYIVFAFSPE-DAMEIQL-----  
FFELALGSFQGLVVAVLYCFLNGEVQLEEVQKKW-----  
>calcr\_Cavia\_porcellus [EMBL: O08893]  
NRTWSNYTLCNAFTPEKLNAYVLYLAIIVGHSSMSIITLVVSLGIFVYFRSLGCQRVTLHKNMFLTYILNSMIIIIHLVEVVP  
NGELVRKDP-----  
VSKILHFFHQYMMACNYFWMLCEGIYLTIVVSVFNEAKH----  
LRWYLLGWGFPLVPTTIHAITRALYFN-----DNCW-  
ISVDTHLLYIIHGPMVALVNVFFFLNIVRVLVTKMR--  
ETHEAE-----  
SYMYLKAVKATMILVPLLGIQFVVFPWRPSNKVLGKIYD-----  
YFMHSLIHFGQFFVATIYCFCNNEVQTLKRQWAQFKIQW  
>calcr\_Mus\_musculus [EMBL: Q60755]  
NRTWSNYTLCNAFTSEKLNAYVLYLALVGHSSLSIAALVASMLIFWIFKNLSCQRVTLHKKHMFLTYILNSIIIIHLVEVVP  
NGDLVRRDPMHIFHHNTHMWTMQWELSPPLPLCAHEGKMDPHASEVISCKVLHFLHQYMMSCNYFWMLCEGIYLTIVMAVF  
TDEQR----LRWYLLGWGFPIVPTTIHAITRALYFN-----DNCW-  
LSAETHLLYIIHGPMVALVNVFFFLNIVRVLVTKMR--  
QTHEAE-----  
SYMYLKAVKATMVLVPLLGIQFVVFPWRPSNKVLGKIYD-----  
YLMHSLIHFGQFFVATIYCFCNHEVQTLKRQWTQFKIQW  
>rhod\_Camponotus\_abdominalis [EMBL: Q17292]  
----QFPPMNPPLWHALLGFVIGVLGVISVIGNGMVIYIFTTTKS-----  
LRTPSNLLVVNLAISDFLMMCLMSPAMVINCYY---ETWVLGP-----  
LFCELYGLAGSLFGCASIWMTMIAFDRYNVIVKGLSAKPMTI-  
NGALIRILTIWFFTLAWTIAPMFGWNRYPVEGNMT-----ACGTDY--LTKD--LFSRSYI--  
LIYSIFVYFTPLFLIIYSYFFIIQAVAAHEKNMREQAKKMNVASLRSANQST-----  
-SAECKLAKVALMTISLWFMAWTPYLVINYSGIFETTK-----  
ISPLFTIWGSLFAKANAVYNPIVYGISHPKYRA-----  
>rhod\_Procambarus\_clarkii [EMBL: P35356]  
----QYPPMNPMMYPLLLIFMLFTGILCLAGNFVTIWFVFMNTKS-----  
LRTPANLLVVNLAMSDFLMMFTMFPMMVTCYY---HTWTLGP-----  
TFCQVYAFGLNLCGCASIWMTVFITFDRYNVIVKGVAGEPLST-  
KKASLWILTIVVLSITWCIAFFFGWNRYPVEGNLT-----GCGTDY--LSED--ILSRSYL--  
YDYSTWVYLLPLP-  
IYCYVSIKAVAAHEKGMRDQAKKMGIKSLRNEEAQKT-----  
SAECLAKIAMTTVALWFIAWTPYLLINWVGMFARSY-----  
LSPVYTIWGYVFAKANAVYNPIVYAISHPKYRA-----  
>rhod\_Alligator\_mississippiensis [EMBL: P52202]  
----QYLAEPWKYSALAAAYMFMLIILGFPINFLTLYVTVQH-----KKLRSPLNYILLNLAVADLFMV-  
LGGFTTTLTYTSMN--GYFVFGV-----  
TGCYFEGFFATLGGEEVALWCLVVLAIERYIVVCKPMSNFRFG-  
ENHAIMGVVFTWIMALTCAAPPLVGWSRYIPEGMQCS-----CGVDY--YTLKPEVNNESFV--  
IYMFVVHFAIPLAVIFFCYGRLVCTVKEAAAQ-----QQESATT-----  
QKAEKEVTRMVIIMVVSFLICWVPYASVAFYIFSNQG----  
SDFGPVFMTIPAFFAKSSAIYNPVIYIVMKNQFRN-----  
>rhod\_Astyanax\_fasciatus [EMBL: P41590]  
----QYLLAPPWAYACLAAYMFLLILVGFVFNFLTLYVTIEH-----KKLRTPLNYILLNLAVADLFMV-  
FGGFTTMTYTSLN--GYFVFGV-----  
LGCNLEGFFATFGGINSWCLVVLVLSIERWVVVCKPMSNFRFG-  
ENHAIMGVVFTWFMALACTVPPPLVGWSRYIPEGMQCS-----CGIDY--YTRAEGFNNESEFV--  
IYMFVVHFLTPLFVITFCYGRLVCTVKEAAAQ-----QQESETT-----  
QRAEREVTRMVIIMFIAYLVCWLPYASVSWWIFTNQG----  
SEFGPIFMTVPAFFAKSSSIYNPVIYICLNKQFRH-----  
>rhod\_Caluumys\_philander [EMBL: Q6W3E1]

---QYYLAEPWQFSCLAAYMFMLIVLGFPINFLTLYVTIQH-----KKLRTPLNYILLNLAIADLFMV-  
FGGFTTTTLYTSLH--GYFVFGP-----  
TGCDLEGFFATLGGEIALWSLVLAIERYIVVCKPMSNFRFG-  
ENHAIMGVAFTWVMALACAAPPLVGSRYIPEGMQCS-----CGIDY--YTLKPEVNNESFV--  
IYMFVVHFTIPMVVIFFCYQGLVFTVKEAAAQ-----QQESATT-----  
QKAEKEVTRMVIIMVIAFLICWLPYAGVAFYIF'THQG----  
SNFGPILMTLPAFFAKTSAVYNPVIYIMLNKQFRT-----  
>gnrhr1\_Cavia\_porcellus [EMBL: Q8CH60]  
---QGALPTLTLGKIRVTVTFFLFLVSTTLNASFLLKQKWTQKKEKG-  
KKLSRMKVLLKHLTLANLLETIVMPLDGMWNIT---VQWYAGE-----  
LLCKILSYLKLFSMYAPAFMMVVISLDRSMAITRPLPVQSNR--  
KLEQSMTGLAWGLSSVLAGPQLYIFKMIHLENGPGQ-----TEVFSQCVTHC---SFPQWWHQAFYN--  
FFTFICLFIIPLLIMLICNAKIIFTLTQVLQO-----DSNKLQLNQSKNN-----  
IPRARLRTLKMTVAFAASFIVCWTPYYVVLGLWYWFDPGMLH--  
RMSEPVNHFFFLFAFLNPCFDPLIYGYFSL-----  
>gnrhr1\_Mus\_musculus [EMBL: Q01776]  
---QGKLPRTLTVSGKIRVTVTFFLFLSSTAFNASFLLKQKWTQKRKKG-  
KKLSRMKVLLKHLTLANLLETIVMPLDGMWNIT---VQWYAGE-----  
FLCKVLSYLKLFSMYAPAFMMVVISLDRSLAITQPLAVQSNS--  
KLEQSMISLAWILSIVFAGPQLYIFRMIYLDGSG-----PTVFSQCVTHC---SFPQWWHQAFYN--  
FFTFGCLFIIPLLIMLICNAKIIIFALTRVLHQ-----DPRKLQLNQSKNN-----  
IPRARLRTLKMTVAFATSFVVCWTPYYVVLGIWYWFDPPEMLN--  
RVSEPVNHFFFLFAFLNPCFDPLIYGYFSL-----  
>gnrhr1\_Trichosurus\_vulpecula [EMBL: Q9TTI8]  
---HRDLPTLTLGKIRVMVTFFLFLVSTAFNASFLMKLQRQTQKKEEV-  
KKLTRMKVLLKHLTLANLLETIVMPLDGIWNVT---VQWYAGE-----  
FLCKALSYLKLFSMYAPAFMMVVISLDRFLAITRPLAVKSN--  
KVGQSLIAVAWFLSIVLAGPQLYIFRMIYVEDISGQ-----TGNFSQCVTHC---SFPEWWQEAFYN--  
LLTFSCFLFIGPLLIMLVCNAKIIFTLTQVLHQ-----DPHELQLNRSKNN-----  
IPRARLRTLKMTVAFATLFTICWTPYYVVLGIWYWFDPPEMLN--  
RVSDPVNHFFFLFGLLNPCFDPLIYGYFSL-----  
>gnrhrII\_Callithrix\_jacchus [EMBL: Q95MG6]  
-VEGSELPTFSTAACKVRVGTIVLTVSSAGGNLAVLWSVTRPQPSQ----  
LRPSPVRRFLFAHLAAADLLVTVFVMPLDATWNIT---VQWLAGD-----  
IACRTLMFLKLMAMYAAAFPPVIGLDRQAAVLNPLGSRSGV--RK---  
LLGAAWGLSFLALPQLFLFHTVHRAGPV-----PFTQCATKG---SFKARWQETTYN--  
LFTFCCLFLLPLTAMATCYSRIVLGVSSPRTRKG---SHAPAGEFALRRSFDN-----  
RPRVRLRALRLALLVLLTFILCWTPYYLLGLWYWFSPSMLS--  
EVPSSLSHILFLFGLLNAPLDPLLYGAFTLGCRR-----  
>gnrhr3\_Tetraodon\_nigroviridis [EMBL: Q3LG36]  
--DALQLPTFSTAACKVRVITFSLCAVSVCNLVVLWAAGNG---G----  
KRKSHVRILIMNLTVADLLVTFVMPVDAVWNIT---VQWQAGD-----  
AACRLLMFLKLVAMYSCAFVTVVISLDRQSAIILNPLGISEAK--  
RKSKITLAVAWTMSVLSLPQMFIFHNVTITVPE-----NFTQCTTHG---SFVQHWQETLYN--  
MFTFACLFLLPLIIMIFCYTRILVEISSRMAR-----NNLSRDVHLRRSHNN-----  
IPKARMRTLKMSIVIVTSFIVCWTPYYLLGLWYWLFPEKME-  
ETVSHSLTHMLFIFGLFNACLDPITYGLFTVRLHQGLKR-----  
>gnrhr2\_Gallus\_gallus [EMBL: Q5EFE0]  
AEEPLLLPTFSPAAQARVAATFVLFVLSAGCNVAVLRAAGGRR--G----  
GGRSHIRVLLRHLAAADLLVTVVMPLDIWNIT---LQWRAGD-----  
LACRLLMYLRLLAMYASAFVTVVISLDRQAAIILRPLAIARAR--  
CRNRAMLRAAWMLSAALAVPQLFLFHTVTLHAPH-----NFTQCTTHG---SFPQWHETLYN--  
MLSFSCFLFLLPLLIMVCCYTRILLEISRRMGS-----SLFSSRDVPLRCSGSN-----  
IPRARLRTLKMSLVIVSSFILCWTPYYLLGLWYWFPCPRAMQ-  
QKVPPSLSHILFIFGLFNACLDPITYGLFTIPFRRRCGCP-----  
>vasr2\_Mus\_musculus [EMBL: Q3SWS4]  
-----LVRAELALLSTIFVAVALSNGLVLGALIRRGR-----  
RGRWAPMHVFISHLCLADLAVALFQVLPQLAWDAT---DRFHGPD-----  
ALCRAVKYLQVMGYASSYMIAMTLDRHRAICRPMLAYRHGGGARWNRPVLVAVAFSLLLSLPQLFIFAQRDVGNGS-----

-----GVFDCWARF-----AEPWGLRAYV--  
TWIALMVFVAPALGIAACQVLIFREIHASLVPGPSEERAGRRRR---GHRTGSPSEG-----  
AHVSAAMAKTVRMTLDPPLCCSCCWLALTAVPTPGSMLPS-----  
VAVSPRSCVACFAVLRGTPHTAWVLKMSF-----
